# Supplementary material
Source: publisher site journal article supplement (https://www.spandidos-publications.com/6606/downloadSupplementary)
Supplement: Supplementary file 1 [file downloadSupplementary]

## Sheet: Sheet1
Table SI. Cell subtype marker genes extracted from the single-cell expression profile.
Symbol	p_val	avg_log2FC	pct.1	pct.2	p_val_adj	cluster	gene
FTL	4.25879e-38	-1.05275	0.545	0.735	1.43496e-33	Tissue_stem_cells	FTL
PMEL	3.56024e-37	1.3885	0.492	0.387	1.19959e-32	Fibroblasts	PMEL
CD63	8.96552e-15	1.04565	0.449	0.426	3.02084e-10	Fibroblasts	CD63
TYRP1	9.38543e-09	1.47525	0.284	0.25	0.000316233	Fibroblasts	TYRP1
TMSB4X	0	4.83745	0.846	0.156	0	Macrophage	TMSB4X
TYROBP	0	4.31055	0.452	0.004	0	Macrophage	TYROBP
HLA-DRA	0	4.09248	0.378	0.006	0	Macrophage	HLA-DRA
CD74	0	3.70253	0.329	0.022	0	Macrophage	CD74
AIF1	0	3.06932	0.28	0.002	0	Macrophage	AIF1
HLA-DPA1	1.08448e-263	3.37999	0.326	0.027	3.65405e-259	Macrophage	HLA-DPA1
HLA-DPB1	2.80189e-245	3.70946	0.406	0.047	9.44067e-241	Macrophage	HLA-DPB1
FTL.1	3.44361e-196	4.50934	0.939	0.621	1.16029e-191	Macrophage	FTL
LGALS1	7.00698e-90	2.83484	0.483	0.164	2.36093e-85	Macrophage	LGALS1
FTH1	2.30443e-84	1.98929	0.897	0.723	7.76454e-80	Macrophage	FTH1
GPX1	4.13629e-69	2.57948	0.445	0.171	1.39368e-64	Macrophage	GPX1
B2M	8.89021e-60	1.82941	0.606	0.313	2.99547e-55	Macrophage	B2M
TMSB10	5.44694e-56	1.51388	0.69	0.442	1.83529e-51	Macrophage	TMSB10
SEPP1	3.39986e-52	2.78382	0.301	0.098	1.14555e-47	Macrophage	SEPP1
LGALS3	5.38249e-42	2.43788	0.31	0.116	1.81358e-37	Macrophage	LGALS3
APOC1	6.79913e-32	2.61588	0.322	0.15	2.2909e-27	Macrophage	APOC1
MLANA	1.05958e-30	-1.18578	0.242	0.542	3.57016e-26	Macrophage	MLANA
OAZ1	1.069e-28	1.59189	0.431	0.254	3.60188e-24	Macrophage	OAZ1
TUBA1B	1.75292e-23	1.86834	0.343	0.188	5.9063e-19	Macrophage	TUBA1B
S100A11	1.16059e-22	1.33451	0.431	0.264	3.9105e-18	Macrophage	S100A11
YBX1	7.04273e-22	1.36053	0.462	0.309	2.37298e-17	Macrophage	YBX1
NPC2	4.23279e-21	1.46254	0.396	0.249	1.4262e-16	Macrophage	NPC2
PMEL.1	4.7357e-20	-1.45802	0.182	0.397	1.59565e-15	Macrophage	PMEL
SNHG7	2.04606e-19	-1.06155	0.152	0.372	6.89401e-15	Macrophage	SNHG7
C6orf48	2.02617e-18	-1.11831	0.242	0.448	6.82698e-14	Macrophage	C6orf48
ACTB	4.25747e-17	1.40423	0.389	0.255	1.43451e-12	Macrophage	ACTB
CSTB	1.48408e-16	1.57649	0.413	0.283	5.00047e-12	Macrophage	CSTB
LDHB	1.50248e-15	-1.0964	0.142	0.325	5.06245e-11	Macrophage	LDHB
EIF3E	1.58726e-14	-1.06012	0.196	0.37	5.3481e-10	Macrophage	EIF3E
SAT1	1.5431e-13	1.50533	0.31	0.197	5.19933e-09	Macrophage	SAT1
TYRP1.1	5.92277e-13	-1.18181	0.1	0.255	1.99562e-08	Macrophage	TYRP1
GPX4	3.99768e-09	1.22119	0.277	0.189	0.000134698	Macrophage	GPX4
MYL6	1.08367e-08	1.01573	0.333	0.247	0.000365131	Macrophage	MYL6
CST3	1.06595e-07	1.35478	0.261	0.186	0.00359162	Macrophage	CST3
ARPC3	1.94171e-07	1.12613	0.275	0.198	0.00654239	Macrophage	ARPC3
CCL5	0	5.11754	0.898	0.003	0	NK_cell	CCL5
NKG7	0	4.31251	0.703	0.001	0	NK_cell	NKG7
CD52	0	4.31006	0.93	0.004	0	NK_cell	CD52
S100A4	0	4.0722	0.836	0.019	0	NK_cell	S100A4
IL32	0	3.89827	0.875	0.002	0	NK_cell	IL32
TRAC	0	3.78882	0.883	0.001	0	NK_cell	TRAC
GNLY	0	3.75985	0.352	0.001	0	NK_cell	GNLY
CXCR4	0	3.69277	0.852	0.006	0	NK_cell	CXCR4
GZMA	0	3.64972	0.812	0.001	0	NK_cell	GZMA
CD2	0	3.5445	0.867	0.001	0	NK_cell	CD2
CD3D	0	3.42746	0.898	0.001	0	NK_cell	CD3D
CCL4	0	3.38551	0.57	0.002	0	NK_cell	CCL4
HCST	0	3.34369	0.836	0.006	0	NK_cell	HCST
CORO1A	0	3.31487	0.844	0.003	0	NK_cell	CORO1A
KLRB1	0	3.23755	0.375	0.001	0	NK_cell	KLRB1
GZMH	0	3.14054	0.602	0	0	NK_cell	GZMH
ARHGDIB	0	3.10597	0.859	0.018	0	NK_cell	ARHGDIB
TRBC2	0	3.08888	0.695	0.001	0	NK_cell	TRBC2
SRGN	0	3.06641	0.906	0.038	0	NK_cell	SRGN
RGS1	0	3.05411	0.578	0.018	0	NK_cell	RGS1
LTB	0	3.05297	0.555	0.002	0	NK_cell	LTB
CST7	0	3.02642	0.703	0.001	0	NK_cell	CST7
CD69	0	2.96199	0.766	0.001	0	NK_cell	CD69
PTPRC	0	2.93501	0.836	0.002	0	NK_cell	PTPRC
GZMK	0	2.86417	0.461	0	0	NK_cell	GZMK
RARRES3	0	2.79998	0.766	0.011	0	NK_cell	RARRES3
TRBC1	0	2.75519	0.438	0.001	0	NK_cell	TRBC1
ANXA1	0	2.63272	0.617	0.011	0	NK_cell	ANXA1
CD48	0	2.57884	0.711	0.006	0	NK_cell	CD48
CD3G	0	2.56559	0.711	0	0	NK_cell	CD3G
PSMB9	0	2.5303	0.672	0.02	0	NK_cell	PSMB9
RAC2	0	2.52526	0.727	0.006	0	NK_cell	RAC2
TSC22D3	0	2.32745	0.609	0.027	0	NK_cell	TSC22D3
LAPTM5	0	2.30598	0.688	0.006	0	NK_cell	LAPTM5
ACAP1	0	2.28191	0.625	0.005	0	NK_cell	ACAP1
GIMAP7	0	2.22561	0.57	0.002	0	NK_cell	GIMAP7
GZMB	0	2.20521	0.305	0	0	NK_cell	GZMB
CD37	0	2.18698	0.625	0.004	0	NK_cell	CD37
GMFG	0	2.18323	0.656	0.005	0	NK_cell	GMFG
LCP1	0	2.17746	0.625	0.002	0	NK_cell	LCP1
EVL	0	2.12015	0.68	0.03	0	NK_cell	EVL
STK17B	0	2.1127	0.547	0.003	0	NK_cell	STK17B
CD8A	0	2.08426	0.391	0	0	NK_cell	CD8A
ITGB2	0	2.07551	0.578	0.003	0	NK_cell	ITGB2
APOBEC3G	0	2.07399	0.547	0.018	0	NK_cell	APOBEC3G
FYB	0	2.05664	0.609	0.01	0	NK_cell	FYB
ISG20	0	2.04212	0.461	0.009	0	NK_cell	ISG20
ARL4C	0	2.03146	0.602	0.005	0	NK_cell	ARL4C
CD74.1	0	2.02323	0.672	0.024	0	NK_cell	CD74
ALOX5AP	0	1.87794	0.438	0.002	0	NK_cell	ALOX5AP
LCK	0	1.86107	0.516	0	0	NK_cell	LCK
GZMM	0	1.8405	0.5	0.001	0	NK_cell	GZMM
TBC1D10C	0	1.83834	0.445	0.001	0	NK_cell	TBC1D10C
CD7	0	1.82916	0.398	0.001	0	NK_cell	CD7
C12orf75	0	1.82088	0.453	0.006	0	NK_cell	C12orf75
CD8B	0	1.80876	0.344	0	0	NK_cell	CD8B
GIMAP4	0	1.78814	0.477	0.001	0	NK_cell	GIMAP4
CD3E	0	1.78429	0.469	0.001	0	NK_cell	CD3E
RUNX3	0	1.77674	0.445	0.007	0	NK_cell	RUNX3
TNFAIP3	0	1.77216	0.398	0.006	0	NK_cell	TNFAIP3
STK17A	0	1.74098	0.484	0.013	0	NK_cell	STK17A
CD53	0	1.74089	0.445	0.002	0	NK_cell	CD53
LSP1	0	1.72371	0.469	0.005	0	NK_cell	LSP1
CYTIP	0	1.72274	0.461	0.001	0	NK_cell	CYTIP
IL2RG	0	1.70971	0.477	0.001	0	NK_cell	IL2RG
MYO1F	0	1.70259	0.453	0.006	0	NK_cell	MYO1F
PTPN7	0	1.66846	0.406	0.003	0	NK_cell	PTPN7
AC092580.4	0	1.66722	0.414	0	0	NK_cell	AC092580.4
TRAF3IP3	0	1.65545	0.406	0	0	NK_cell	TRAF3IP3
HOPX	0	1.65102	0.297	0.003	0	NK_cell	HOPX
KLRD1	0	1.6331	0.25	0.001	0	NK_cell	KLRD1
CD247	0	1.61859	0.445	0	0	NK_cell	CD247
AKNA	0	1.58831	0.406	0.008	0	NK_cell	AKNA
WIPF1	0	1.58282	0.461	0.012	0	NK_cell	WIPF1
CTSW	0	1.5196	0.359	0	0	NK_cell	CTSW
BIN2	0	1.48655	0.375	0.001	0	NK_cell	BIN2
CD27	0	1.4797	0.273	0.001	0	NK_cell	CD27
PRF1	0	1.47568	0.297	0	0	NK_cell	PRF1
TUBA4A	0	1.46311	0.383	0.004	0	NK_cell	TUBA4A
EVI2B	0	1.39899	0.367	0.002	0	NK_cell	EVI2B
LAT	0	1.38387	0.383	0.005	0	NK_cell	LAT
RHOF	0	1.36885	0.391	0.008	0	NK_cell	RHOF
SPOCK2	0	1.36766	0.359	0	0	NK_cell	SPOCK2
PIM1	0	1.36667	0.367	0.006	0	NK_cell	PIM1
GPR183	0	1.33701	0.281	0.001	0	NK_cell	GPR183
SAMD3	0	1.3203	0.336	0	0	NK_cell	SAMD3
APBB1IP	0	1.31973	0.352	0.001	0	NK_cell	APBB1IP
SIT1	0	1.3192	0.305	0	0	NK_cell	SIT1
PYHIN1	0	1.31793	0.297	0.002	0	NK_cell	PYHIN1
SPN	0	1.29595	0.344	0.001	0	NK_cell	SPN
TNFAIP8	0	1.29123	0.312	0.004	0	NK_cell	TNFAIP8
GATA3	0	1.28781	0.32	0	0	NK_cell	GATA3
RP11-347P5.1	0	1.28726	0.289	0.002	0	NK_cell	RP11-347P5.1
GPR65	0	1.28647	0.344	0.001	0	NK_cell	GPR65
IKZF3	0	1.27484	0.312	0.001	0	NK_cell	IKZF3
BCL11B	0	1.26501	0.297	0	0	NK_cell	BCL11B
EMB	0	1.26103	0.32	0.002	0	NK_cell	EMB
SH2D1A	0	1.2471	0.289	0	0	NK_cell	SH2D1A
HCLS1	0	1.24503	0.336	0.002	0	NK_cell	HCLS1
UCP2	0	1.22634	0.336	0.003	0	NK_cell	UCP2
DOK2	0	1.2234	0.336	0.002	0	NK_cell	DOK2
GIMAP1	0	1.2195	0.273	0.001	0	NK_cell	GIMAP1
GNG2	0	1.19634	0.305	0.006	0	NK_cell	GNG2
RHOH	0	1.19347	0.305	0.001	0	NK_cell	RHOH
TGFB1	0	1.18949	0.297	0.004	0	NK_cell	TGFB1
DOCK8	0	1.18744	0.344	0.008	0	NK_cell	DOCK8
ARHGAP30	0	1.18302	0.281	0.001	0	NK_cell	ARHGAP30
SKAP1	0	1.174	0.32	0	0	NK_cell	SKAP1
IKZF1	0	1.15798	0.289	0	0	NK_cell	IKZF1
IL16	0	1.15327	0.266	0.004	0	NK_cell	IL16
IL2RB	0	1.15129	0.266	0	0	NK_cell	IL2RB
ABI3	0	1.13356	0.266	0.001	0	NK_cell	ABI3
CRIP1	0	1.10932	0.273	0.002	0	NK_cell	CRIP1
ARHGAP15	0	1.04295	0.281	0.005	0	NK_cell	ARHGAP15
CD6	0	1.03359	0.273	0	0	NK_cell	CD6
ITM2A	6.13453e-304	1.35899	0.273	0.005	2.06697e-299	NK_cell	ITM2A
DUSP2	5.86957e-293	2.60135	0.555	0.025	1.97769e-288	NK_cell	DUSP2
HLA-F	1.07764e-281	1.53386	0.445	0.016	3.63101e-277	NK_cell	HLA-F
PPP1R18	1.37243e-259	1.65113	0.508	0.024	4.62426e-255	NK_cell	PPP1R18
GLRX	3.18782e-257	1.34658	0.391	0.013	1.07411e-252	NK_cell	GLRX
COTL1	1.81271e-249	2.1396	0.602	0.035	6.10773e-245	NK_cell	COTL1
RORA	1.83605e-243	1.59049	0.383	0.014	6.18639e-239	NK_cell	RORA
STK4	1.26492e-241	1.85877	0.555	0.031	4.26202e-237	NK_cell	STK4
LBH	6.6564e-240	1.43363	0.414	0.017	2.24281e-235	NK_cell	LBH
PARP8	1.99948e-238	1.03992	0.273	0.007	6.73704e-234	NK_cell	PARP8
ZFP36L2	5.83274e-236	3.00493	0.797	0.071	1.96528e-231	NK_cell	ZFP36L2
ISG15	3.40065e-234	2.5389	0.461	0.021	1.14581e-229	NK_cell	ISG15
TRIM22	3.76549e-230	1.06001	0.297	0.008	1.26874e-225	NK_cell	TRIM22
SLC38A1	4.89959e-227	1.16237	0.297	0.009	1.65087e-222	NK_cell	SLC38A1
2024-09-06	9.51745e-219	1.19465	0.367	0.014	3.20681e-214	NK_cell	2024-09-06
LIMD2	1.58072e-211	1.72576	0.602	0.042	5.32609e-207	NK_cell	LIMD2
APOL6	2.31921e-210	1.30922	0.336	0.012	7.81436e-206	NK_cell	APOL6
PTGER4	5.10016e-209	1.20821	0.32	0.011	1.71845e-204	NK_cell	PTGER4
RNF213	3.4893e-203	1.93625	0.656	0.053	1.17568e-198	NK_cell	RNF213
SH3BGRL3	2.62772e-200	2.90781	0.961	0.127	8.85383e-196	NK_cell	SH3BGRL3
CELF2	5.08162e-200	1.48957	0.422	0.021	1.7122e-195	NK_cell	CELF2
CLEC2B	9.61745e-199	1.66053	0.523	0.033	3.2405e-194	NK_cell	CLEC2B
SAMD9	1.78417e-193	1.11193	0.289	0.01	6.01159e-189	NK_cell	SAMD9
HLA-C	4.98553e-192	3.54255	0.992	0.149	1.67983e-187	NK_cell	HLA-C
RGCC	6.07036e-191	1.86819	0.359	0.016	2.04535e-186	NK_cell	RGCC
HLA-DRB1	7.58445e-191	1.1424	0.289	0.01	2.55551e-186	NK_cell	HLA-DRB1
TMSB4X.1	2.78698e-189	4.9605	1	0.166	9.39045e-185	NK_cell	TMSB4X
SLFN5	1.70782e-185	1.26526	0.352	0.016	5.75434e-181	NK_cell	SLFN5
DUSP1	1.52758e-184	2.57035	0.609	0.05	5.14702e-180	NK_cell	DUSP1
KIAA1551	8.77975e-179	1.44993	0.391	0.02	2.95825e-174	NK_cell	KIAA1551
AAK1	1.4731e-177	1.49408	0.469	0.03	4.96347e-173	NK_cell	AAK1
HLA-B	1.8637e-177	3.41639	1	0.158	6.27955e-173	NK_cell	HLA-B
IRF1	3.08856e-176	2.10212	0.508	0.036	1.04066e-171	NK_cell	IRF1
TC2N	1.2106e-173	1.02957	0.266	0.009	4.07898e-169	NK_cell	TC2N
HLA-E	2.10609e-163	2.38274	0.914	0.135	7.09625e-159	NK_cell	HLA-E
ID2	2.30949e-161	2.49508	0.742	0.088	7.78161e-157	NK_cell	ID2
CLEC2D	3.43232e-155	1.43307	0.406	0.025	1.15649e-150	NK_cell	CLEC2D
KLF6	1.36616e-153	2.33999	0.758	0.097	4.60315e-149	NK_cell	KLF6
DDIT4	6.17767e-153	1.56465	0.43	0.029	2.0815e-148	NK_cell	DDIT4
GLIPR2	1.64982e-151	1.01699	0.281	0.012	5.5589e-147	NK_cell	GLIPR2
SAMD9L	3.63254e-149	1.31365	0.297	0.014	1.22395e-144	NK_cell	SAMD9L
BTG1	1.72283e-140	2.97556	0.984	0.194	5.80491e-136	NK_cell	BTG1
CYBA	2.27346e-139	1.78924	0.812	0.12	7.6602e-135	NK_cell	CYBA
PPP2R5C	6.92957e-138	1.64382	0.531	0.05	2.33485e-133	NK_cell	PPP2R5C
NR4A2	1.35381e-135	1.59139	0.32	0.018	4.56152e-131	NK_cell	NR4A2
CKLF	1.88321e-134	1.70241	0.594	0.065	6.34529e-130	NK_cell	CKLF
SUN2	2.87108e-132	1.07174	0.32	0.018	9.6738e-128	NK_cell	SUN2
FNBP1	8.28006e-128	1.50895	0.531	0.054	2.78988e-123	NK_cell	FNBP1
BST2	1.59436e-123	1.10078	0.32	0.019	5.37205e-119	NK_cell	BST2
B2M.1	8.147e-121	4.00428	1	0.315	2.74505e-116	NK_cell	B2M
CALM1	6.07125e-120	1.83507	0.883	0.165	2.04565e-115	NK_cell	CALM1
ZFP36	6.5078e-119	2.17588	0.578	0.069	2.19274e-114	NK_cell	ZFP36
CDC42SE2	3.73026e-118	1.1313	0.32	0.021	1.25688e-113	NK_cell	CDC42SE2
HMGB2	3.74354e-117	1.67856	0.398	0.032	1.26135e-112	NK_cell	HMGB2
HLA-A	1.41769e-116	2.49212	1	0.228	4.77675e-112	NK_cell	HLA-A
SYNRG	1.34003e-115	1.19703	0.328	0.022	4.51508e-111	NK_cell	SYNRG
TSTD1	1.88859e-115	1.13929	0.367	0.028	6.36341e-111	NK_cell	TSTD1
ARPC2	1.10991e-114	1.84819	0.859	0.164	3.73974e-110	NK_cell	ARPC2
EML4	1.65272e-113	1.39838	0.375	0.03	5.56869e-109	NK_cell	EML4
CNN2	8.3239e-113	1.02708	0.281	0.017	2.80465e-108	NK_cell	CNN2
IDS	2.84084e-112	1.60158	0.414	0.037	9.57192e-108	NK_cell	IDS
GPSM3	4.74806e-111	1.34569	0.469	0.047	1.59981e-106	NK_cell	GPSM3
UBE2L6	6.80045e-111	1.13778	0.352	0.026	2.29134e-106	NK_cell	UBE2L6
SUB1	9.4656e-110	1.6165	0.844	0.162	3.18934e-105	NK_cell	SUB1
CHST12	9.39457e-109	1.34415	0.352	0.027	3.16541e-104	NK_cell	CHST12
TXNIP	5.48196e-108	1.93806	0.625	0.088	1.84709e-103	NK_cell	TXNIP
CTSC	3.4833e-107	1.40816	0.516	0.06	1.17366e-102	NK_cell	CTSC
PFN1	1.81577e-105	1.98486	0.953	0.214	6.11805e-101	NK_cell	PFN1
ACTB.1	6.43081e-104	2.46598	0.992	0.254	2.1668e-99	NK_cell	ACTB
MCL1	6.72752e-104	1.61162	0.578	0.079	2.26677e-99	NK_cell	MCL1
CCND3	1.47231e-103	1.41923	0.391	0.035	4.96081e-99	NK_cell	CCND3
TAP1	6.32342e-102	1.31763	0.367	0.032	2.13061e-97	NK_cell	TAP1
SMCHD1	3.12282e-101	1.2456	0.398	0.038	1.0522e-96	NK_cell	SMCHD1
JUNB	3.34105e-101	2.04474	0.727	0.117	1.12573e-96	NK_cell	JUNB
HLA-DPB1.1	1.06132e-100	1.18213	0.477	0.052	3.576e-96	NK_cell	HLA-DPB1
MYL12A	6.88426e-100	1.62753	0.922	0.21	2.31958e-95	NK_cell	MYL12A
PSME1	7.79475e-100	1.65332	0.703	0.122	2.62636e-95	NK_cell	PSME1
MSN	4.15626e-99	1.31149	0.477	0.055	1.40041e-94	NK_cell	MSN
CYLD	6.40964e-98	1.01147	0.25	0.015	2.15966e-93	NK_cell	CYLD
ETS1	3.18998e-97	1.23304	0.398	0.039	1.07483e-92	NK_cell	ETS1
CIB1	5.85827e-97	1.26155	0.531	0.069	1.97389e-92	NK_cell	CIB1
BTG2	2.42721e-95	1.70859	0.422	0.045	8.17825e-91	NK_cell	BTG2
DDX5	1.08075e-94	1.46507	0.836	0.173	3.64148e-90	NK_cell	DDX5
EMP3	1.12567e-94	1.44756	0.609	0.094	3.79285e-90	NK_cell	EMP3
SLF1	1.76017e-94	1.10365	0.258	0.017	5.93073e-90	NK_cell	SLF1
ARPC1B	3.00876e-94	1.10043	0.773	0.144	1.01377e-89	NK_cell	ARPC1B
LINC00152	6.75264e-94	1.21159	0.328	0.027	2.27523e-89	NK_cell	LINC00152
JAK1	1.57582e-93	1.38803	0.414	0.044	5.30958e-89	NK_cell	JAK1
SRSF7	1.71554e-93	1.64735	0.695	0.125	5.78033e-89	NK_cell	SRSF7
FAM49B	3.04134e-91	1.27692	0.43	0.048	1.02475e-86	NK_cell	FAM49B
ARL6IP5	3.03827e-89	1.40749	0.57	0.088	1.02372e-84	NK_cell	ARL6IP5
OCIAD2	3.34315e-89	1.07957	0.406	0.043	1.12644e-84	NK_cell	OCIAD2
ICAM3	5.15885e-89	1.12249	0.344	0.031	1.73822e-84	NK_cell	ICAM3
N4BP2L2	3.96263e-88	1.20205	0.633	0.108	1.33517e-83	NK_cell	N4BP2L2
2024-09-09	8.59122e-88	1.22058	0.516	0.073	2.89473e-83	NK_cell	2024-09-09
H3F3B	3.69867e-85	1.94477	0.969	0.258	1.24623e-80	NK_cell	H3F3B
SH3KBP1	1.98781e-84	1.03518	0.32	0.029	6.69774e-80	NK_cell	SH3KBP1
LEPROTL1	2.18818e-84	1.35643	0.477	0.064	7.37284e-80	NK_cell	LEPROTL1
SRSF5	2.94738e-84	1.37512	0.734	0.15	9.93092e-80	NK_cell	SRSF5
RAP1A	6.04403e-84	1.16929	0.414	0.048	2.03648e-79	NK_cell	RAP1A
TAPBP	1.09864e-82	1.20737	0.414	0.049	3.70175e-78	NK_cell	TAPBP
SON	2.37675e-80	1.13774	0.672	0.131	8.00821e-76	NK_cell	SON
MYL6.1	3.26035e-80	1.38852	0.93	0.245	1.09854e-75	NK_cell	MYL6
PRKCH	3.33601e-80	1.10188	0.289	0.025	1.12404e-75	NK_cell	PRKCH
PPP1CA	6.28226e-80	1.04388	0.586	0.1	2.11674e-75	NK_cell	PPP1CA
FYN	4.15043e-79	1.10262	0.32	0.031	1.39845e-74	NK_cell	FYN
PIK3R1	8.03011e-79	1.09403	0.258	0.02	2.70567e-74	NK_cell	PIK3R1
STAT1	9.01392e-79	1.36479	0.297	0.026	3.03715e-74	NK_cell	STAT1
TMA7	1.95104e-78	1.18969	0.906	0.231	6.57384e-74	NK_cell	TMA7
ARF6	5.28089e-78	1.37003	0.461	0.065	1.77934e-73	NK_cell	ARF6
PSME2	7.74512e-78	1.26014	0.555	0.093	2.60964e-73	NK_cell	PSME2
PRPF38B	1.28986e-77	1.2335	0.445	0.061	4.34605e-73	NK_cell	PRPF38B
FUS	5.46525e-77	1.18822	0.633	0.122	1.84146e-72	NK_cell	FUS
DDX24	6.01147e-77	1.23641	0.547	0.092	2.02551e-72	NK_cell	DDX24
ARID4B	2.84368e-76	1.22043	0.445	0.062	9.5815e-72	NK_cell	ARID4B
ARPC3.1	2.16399e-75	1.10885	0.812	0.196	7.29134e-71	NK_cell	ARPC3
CD99	8.61481e-75	1.26189	0.617	0.119	2.90268e-70	NK_cell	CD99
NFKBIA	3.80961e-74	2.08866	0.414	0.055	1.28361e-69	NK_cell	NFKBIA
ITM2B	4.27222e-74	1.22708	0.703	0.153	1.43948e-69	NK_cell	ITM2B
CLIC1	2.77467e-73	1.18216	0.75	0.173	9.34898e-69	NK_cell	CLIC1
ABRACL	2.80291e-73	1.10378	0.453	0.065	9.44412e-69	NK_cell	ABRACL
IDH2	3.45304e-73	1.1285	0.344	0.038	1.16347e-68	NK_cell	IDH2
CFLAR	6.52203e-73	1.12441	0.352	0.04	2.19753e-68	NK_cell	CFLAR
ANKRD12	3.20834e-70	1.2256	0.484	0.079	1.08102e-65	NK_cell	ANKRD12
CFL1	2.97977e-69	1.28549	0.914	0.261	1.004e-64	NK_cell	CFL1
ELF1	1.68837e-68	1.20025	0.383	0.05	5.68879e-64	NK_cell	ELF1
CCNL1	1.88447e-68	1.4082	0.492	0.083	6.34952e-64	NK_cell	CCNL1
IFITM2	1.19966e-67	1.37818	0.625	0.129	4.04212e-63	NK_cell	IFITM2
LYAR	1.43311e-67	1.17774	0.391	0.053	4.82873e-63	NK_cell	LYAR
BTN3A2	1.82969e-67	1.02679	0.289	0.029	6.16497e-63	NK_cell	BTN3A2
AKAP13	9.90962e-67	1.09811	0.344	0.041	3.33895e-62	NK_cell	AKAP13
ARGLU1	2.68556e-66	1.2776	0.477	0.08	9.04873e-62	NK_cell	ARGLU1
CAP1	4.06711e-66	1.23785	0.492	0.085	1.37037e-61	NK_cell	CAP1
PNISR	5.67043e-66	1.11093	0.547	0.105	1.9106e-61	NK_cell	PNISR
PSMB8	1.34413e-64	1.13361	0.453	0.073	4.52892e-60	NK_cell	PSMB8
CCDC12	7.24822e-64	1.08339	0.422	0.065	2.44222e-59	NK_cell	CCDC12
SARAF	9.25893e-64	1.31924	0.703	0.171	3.1197e-59	NK_cell	SARAF
MALAT1	1.67493e-63	1.66274	1	0.909	5.64349e-59	NK_cell	MALAT1
WHSC1L1	3.56384e-62	1.19953	0.43	0.069	1.2008e-57	NK_cell	WHSC1L1
PCSK7	3.7585e-62	1.15914	0.32	0.039	1.26639e-57	NK_cell	PCSK7
PRR13	1.27986e-61	1.1096	0.508	0.095	4.31235e-57	NK_cell	PRR13
SS18L2	4.27127e-61	1.00682	0.375	0.053	1.43916e-56	NK_cell	SS18L2
DHX36	4.39727e-61	1.15407	0.406	0.063	1.48162e-56	NK_cell	DHX36
PPP1R2	5.97759e-61	1.16969	0.336	0.043	2.01409e-56	NK_cell	PPP1R2
MT2A	7.56877e-60	1.64027	0.516	0.099	2.55022e-55	NK_cell	MT2A
UBC	1.96801e-59	1.1289	0.758	0.201	6.63103e-55	NK_cell	UBC
CASP4	4.88341e-58	1.10715	0.406	0.065	1.64542e-53	NK_cell	CASP4
LRRFIP1	1.81789e-57	1.03611	0.484	0.093	6.1252e-53	NK_cell	LRRFIP1
VAMP2	1.86134e-57	1.17169	0.516	0.105	6.27161e-53	NK_cell	VAMP2
JUN	2.12288e-57	1.39291	0.547	0.107	7.15282e-53	NK_cell	JUN
HMGN2	2.65692e-57	1.03105	0.5	0.095	8.95224e-53	NK_cell	HMGN2
NCOR1	3.17044e-57	1.0301	0.453	0.083	1.06825e-52	NK_cell	NCOR1
FXYD5	2.19819e-56	1.15776	0.5	0.1	7.40659e-52	NK_cell	FXYD5
RBM39	1.24622e-55	1.01121	0.586	0.137	4.19903e-51	NK_cell	RBM39
PTP4A2	5.28068e-55	1.14734	0.414	0.071	1.77927e-50	NK_cell	PTP4A2
SRRM1	2.91479e-54	1.20136	0.461	0.089	9.8211e-50	NK_cell	SRRM1
RPS18	3.26468e-54	-1.5315	1	0.972	1.1e-49	NK_cell	RPS18
RSRP1	1.02548e-53	1.17929	0.328	0.046	3.45526e-49	NK_cell	RSRP1
2024-09-07	4.32496e-53	1.09259	0.555	0.128	1.45725e-48	NK_cell	2024-09-07
CALR	6.46839e-52	1.05923	0.539	0.122	2.17946e-47	NK_cell	CALR
ACTR3	3.21392e-50	1.13666	0.43	0.083	1.0829e-45	NK_cell	ACTR3
MYH9	3.68633e-50	1.12867	0.375	0.063	1.24207e-45	NK_cell	MYH9
IFI16	7.7213e-50	1.17548	0.406	0.073	2.60161e-45	NK_cell	IFI16
ATPIF1	6.40447e-49	1.06815	0.484	0.104	2.15792e-44	NK_cell	ATPIF1
RPL12	8.80805e-49	-1.90668	1	0.902	2.96779e-44	NK_cell	RPL12
IFI6	8.98278e-49	1.45875	0.297	0.04	3.02666e-44	NK_cell	IFI6
KMT2E	2.17696e-47	1.05664	0.438	0.091	7.33505e-43	NK_cell	KMT2E
CD47	1.25039e-46	1.02312	0.312	0.048	4.21306e-42	NK_cell	CD47
CDC42	4.65195e-46	1.03541	0.422	0.085	1.56743e-41	NK_cell	CDC42
SP100	6.13696e-46	1.01244	0.391	0.074	2.06779e-41	NK_cell	SP100
TMSB10.1	1.83931e-45	1.329	1	0.444	6.19737e-41	NK_cell	TMSB10
ADAR	1.02314e-44	1.01622	0.328	0.054	3.44736e-40	NK_cell	ADAR
DNAJB1	1.14811e-44	1.20442	0.352	0.062	3.86845e-40	NK_cell	DNAJB1
REL	1.06007e-43	1.19083	0.273	0.039	3.57178e-39	NK_cell	REL
C9orf78	9.72477e-41	1.02992	0.367	0.073	3.27666e-36	NK_cell	C9orf78
POLR2J3	1.0305e-39	1.01819	0.297	0.05	3.47217e-35	NK_cell	POLR2J3
RPS12	5.58794e-36	-1.10019	1	0.958	1.8828e-31	NK_cell	RPS12
MYADM	6.98047e-36	1.12561	0.289	0.052	2.352e-31	NK_cell	MYADM
RPL37A	1.183e-30	-1.396	1	0.85	3.986e-26	NK_cell	RPL37A
RPL8	2.259e-30	-1.69419	1	0.811	7.61149e-26	NK_cell	RPL8
YPEL5	3.3506e-30	1.21513	0.32	0.072	1.12895e-25	NK_cell	YPEL5
HIST1H4C	3.57342e-30	1.14906	0.375	0.094	1.20403e-25	NK_cell	HIST1H4C
RPL7	8.83224e-30	-1.42289	1	0.822	2.97593e-25	NK_cell	RPL7
RPS3A	9.94739e-24	-1.01986	1	0.836	3.35167e-19	NK_cell	RPS3A
RPS4X	1.50787e-23	-1.09701	0.992	0.813	5.08062e-19	NK_cell	RPS4X
RPL31	8.69844e-23	-1.00874	1	0.848	2.93085e-18	NK_cell	RPL31
DUSP4	8.72914e-23	1.53564	0.273	0.067	2.9412e-18	NK_cell	DUSP4
RPL7A	4.5898e-20	-1.15278	1	0.787	1.54649e-15	NK_cell	RPL7A
RPS6	1.83088e-19	-1.07088	1	0.832	6.16897e-15	NK_cell	RPS6
PPP1R15A	5.43607e-18	1.01392	0.281	0.082	1.83163e-13	NK_cell	PPP1R15A
RPLP0	8.68073e-18	-1.60488	0.977	0.749	2.92489e-13	NK_cell	RPLP0
FOS	2.71167e-17	1.0953	0.391	0.135	9.13671e-13	NK_cell	FOS
MLANA.1	1.99434e-15	-3.25373	0.305	0.537	6.71971e-11	NK_cell	MLANA
VIM	3.30309e-15	-1.83923	0.953	0.728	1.11294e-10	NK_cell	VIM
RPS9	9.31673e-15	-1.05356	0.992	0.753	3.13918e-10	NK_cell	RPS9
RPL10A	4.64562e-14	-1.09947	1	0.738	1.56529e-09	NK_cell	RPL10A
FTH1.1	8.88935e-12	-1.33945	0.961	0.725	2.99518e-07	NK_cell	FTH1
GNB2L1	9.20504e-08	-1.20064	0.984	0.677	0.00310155	NK_cell	GNB2L1
RPL36	9.85024e-08	-1.09439	0.984	0.708	0.00331894	NK_cell	RPL36
PMEL.2	1.12871e-07	-3.09562	0.234	0.393	0.00380307	NK_cell	PMEL
APOE	1.28928e-07	-2.74313	0.148	0.337	0.00434412	NK_cell	APOE
UBE2C	0	2.35002	0.6	0.004	0	Neurons	UBE2C
CENPF	0	2.22419	0.562	0.008	0	Neurons	CENPF
TYMS	0	2.11531	0.787	0.018	0	Neurons	TYMS
BIRC5	0	1.96341	0.662	0.003	0	Neurons	BIRC5
CDKN3	0	1.91451	0.65	0.011	0	Neurons	CDKN3
KIAA0101	0	1.747	0.675	0.009	0	Neurons	KIAA0101
UBE2T	0	1.71714	0.675	0.014	0	Neurons	UBE2T
TOP2A	0	1.70402	0.488	0.003	0	Neurons	TOP2A
PBK	0	1.51221	0.575	0.002	0	Neurons	PBK
MAD2L1	0	1.34856	0.613	0.011	0	Neurons	MAD2L1
GTSE1	0	1.29733	0.5	0.002	0	Neurons	GTSE1
TK1	0	1.29617	0.55	0.003	0	Neurons	TK1
NUSAP1	0	1.28284	0.438	0.004	0	Neurons	NUSAP1
CDK1	0	1.26616	0.45	0.004	0	Neurons	CDK1
CCNB2	0	1.25528	0.525	0.003	0	Neurons	CCNB2
GINS2	0	1.20691	0.475	0.007	0	Neurons	GINS2
CCNA2	0	1.13042	0.45	0.002	0	Neurons	CCNA2
CENPU	0	1.1286	0.562	0.005	0	Neurons	CENPU
TPX2	0	1.10505	0.488	0.004	0	Neurons	TPX2
AURKA	0	1.09431	0.35	0.004	0	Neurons	AURKA
PLK1	0	1.03528	0.288	0.001	0	Neurons	PLK1
CENPM	0	1.02247	0.5	0.006	0	Neurons	CENPM
MKI67	0	1.01302	0.35	0.002	0	Neurons	MKI67
CCNB1	1.4214e-303	1.41167	0.45	0.01	4.78925e-299	Neurons	CCNB1
CENPW	5.89847e-288	1.49523	0.588	0.018	1.98743e-283	Neurons	CENPW
CENPN	6.41594e-278	1.36671	0.625	0.021	2.16179e-273	Neurons	CENPN
HMGB3	4.86013e-253	1.01819	0.525	0.016	1.63757e-248	Neurons	HMGB3
HMGB2.1	5.20455e-249	2.25912	0.713	0.032	1.75362e-244	Neurons	HMGB2
KPNA2	7.1457e-224	1.94409	0.662	0.031	2.40767e-219	Neurons	KPNA2
PTTG1	9.4353e-211	2.72151	0.75	0.043	3.17913e-206	Neurons	PTTG1
SMC4	1.53489e-209	1.26824	0.625	0.029	5.17164e-205	Neurons	SMC4
GMNN	3.70787e-196	1.18526	0.575	0.026	1.24933e-191	Neurons	GMNN
CKS2	2.33685e-174	2.50681	0.787	0.058	7.87377e-170	Neurons	CKS2
GGH	1.99075e-169	1.51506	0.625	0.036	6.70763e-165	Neurons	GGH
TPM4	6.22565e-153	1.51029	0.725	0.055	2.09767e-148	Neurons	TPM4
CKS1B	2.80021e-136	1.53929	0.688	0.055	9.43504e-132	Neurons	CKS1B
PCNA	9.76265e-135	1.34732	0.613	0.043	3.28943e-130	Neurons	PCNA
RPA3	3.39162e-131	1.00768	0.675	0.054	1.14277e-126	Neurons	RPA3
LINC00520	9.04618e-131	1.13506	0.288	0.009	3.04802e-126	Neurons	LINC00520
STMN1	4.07288e-125	2.37773	0.95	0.122	1.37232e-120	Neurons	STMN1
DDX39A	2.87448e-122	1.13687	0.625	0.05	9.68529e-118	Neurons	DDX39A
TUBB2A	1.74814e-115	1.50185	0.662	0.058	5.89017e-111	Neurons	TUBB2A
H2AFV	6.16666e-111	1.42377	0.738	0.079	2.07779e-106	Neurons	H2AFV
HN1	1.54679e-109	1.32445	0.637	0.058	5.21176e-105	Neurons	HN1
MCM3	4.42757e-106	1.18623	0.488	0.035	1.49183e-101	Neurons	MCM3
TUBB4B	5.00943e-104	1.82869	0.775	0.091	1.68788e-99	Neurons	TUBB4B
ANP32E	5.93702e-100	1.1525	0.55	0.047	2.00042e-95	Neurons	ANP32E
FABP5	3.89053e-96	1.39808	0.75	0.088	1.31087e-91	Neurons	FABP5
HLA-G	5.18977e-95	2.00303	0.375	0.023	1.74864e-90	Neurons	HLA-G
TUBA1C	1.45683e-93	1.07528	0.725	0.085	4.90863e-89	Neurons	TUBA1C
CCDC167	8.71611e-93	1.20417	0.662	0.073	2.93681e-88	Neurons	CCDC167
RUVBL2	7.48747e-87	1.10939	0.662	0.077	2.52283e-82	Neurons	RUVBL2
CBR3	2.24356e-86	1.02044	0.488	0.042	7.55946e-82	Neurons	CBR3
SMS	3.04553e-86	1.47602	0.9	0.146	1.02616e-81	Neurons	SMS
HTN3	7.53014e-86	1.90411	0.25	0.011	2.53721e-81	Neurons	HTN3
TBC1D7	3.70832e-85	1.12873	0.688	0.083	1.24948e-80	Neurons	TBC1D7
PHLDA2	2.57396e-84	1.22502	0.425	0.032	8.6727e-80	Neurons	PHLDA2
TAGLN2	9.22701e-82	1.16489	0.762	0.106	3.10895e-77	Neurons	TAGLN2
CACYBP	2.10572e-81	1.14537	0.738	0.101	7.095e-77	Neurons	CACYBP
TCEB1	4.06686e-77	1.2195	0.85	0.142	1.37029e-72	Neurons	TCEB1
HMGN2.1	9.81447e-77	1.58404	0.7	0.095	3.30689e-72	Neurons	HMGN2
LSM5	1.15017e-76	1.1044	0.762	0.115	3.87538e-72	Neurons	LSM5
PGAM1	2.48409e-76	1.0157	0.7	0.095	8.36989e-72	Neurons	PGAM1
TUBA1B.1	1.2591e-73	2.52457	0.912	0.189	4.24241e-69	Neurons	TUBA1B
DENND2A	4.28136e-73	1.57199	0.362	0.027	1.44256e-68	Neurons	DENND2A
RHEB	9.95883e-73	1.23166	0.75	0.119	3.35553e-68	Neurons	RHEB
DEK	3.41346e-72	1.32835	0.787	0.132	1.15013e-67	Neurons	DEK
TIMM50	1.7215e-71	1.05747	0.575	0.069	5.80043e-67	Neurons	TIMM50
LSM4	6.16687e-71	1.04345	0.812	0.139	2.07786e-66	Neurons	LSM4
MIF	6.39868e-71	2.2242	0.912	0.188	2.15597e-66	Neurons	MIF
SRSF2	2.42282e-70	1.06045	0.775	0.126	8.16344e-66	Neurons	SRSF2
POLR2K	2.19234e-69	1.05174	0.775	0.131	7.38685e-65	Neurons	POLR2K
H2AFZ	2.53533e-69	2.81348	1	0.267	8.54255e-65	Neurons	H2AFZ
MORF4L2	4.99862e-69	1.20568	0.762	0.128	1.68424e-64	Neurons	MORF4L2
DBI	2.75241e-68	1.35312	0.85	0.161	9.27396e-64	Neurons	DBI
PTMS	5.31796e-68	1.03757	0.65	0.092	1.79183e-63	Neurons	PTMS
MDH1	1.29826e-66	1.10135	0.75	0.124	4.37436e-62	Neurons	MDH1
UBE2A	1.32205e-66	1.06249	0.575	0.074	4.45452e-62	Neurons	UBE2A
RANBP1	4.58807e-66	1.54705	0.75	0.129	1.54591e-61	Neurons	RANBP1
PSMB1	5.03088e-66	1.21523	0.887	0.175	1.69511e-61	Neurons	PSMB1
SNRPD1	5.40917e-66	1.02969	0.838	0.155	1.82256e-61	Neurons	SNRPD1
NUCKS1	8.76599e-65	1.21183	0.838	0.162	2.95361e-60	Neurons	NUCKS1
PSMD8	8.83903e-65	1.02415	0.75	0.125	2.97822e-60	Neurons	PSMD8
DUT	3.00261e-64	1.2076	0.738	0.124	1.0117e-59	Neurons	DUT
MAP1LC3B	1.78032e-63	1.00991	0.7	0.112	5.9986e-59	Neurons	MAP1LC3B
HTN1	4.12717e-62	2.66468	0.375	0.034	1.39061e-57	Neurons	HTN1
KLHDC3	6.75138e-62	1.01036	0.6	0.085	2.27481e-57	Neurons	KLHDC3
GPAA1	1.53183e-61	1.07254	0.588	0.084	5.16134e-57	Neurons	GPAA1
PSMA7	4.58123e-61	1.4566	0.9	0.194	1.5436e-56	Neurons	PSMA7
SNRPB	1.34752e-60	1.21687	0.775	0.147	4.54033e-56	Neurons	SNRPB
HNRNPA2B1	2.26237e-60	1.4662	0.863	0.186	7.62284e-56	Neurons	HNRNPA2B1
PGK1	4.46409e-60	1.16115	0.775	0.14	1.50413e-55	Neurons	PGK1
ARPC2.1	1.20832e-58	1.03353	0.838	0.166	4.07131e-54	Neurons	ARPC2
MDK	1.73132e-58	1.24006	0.6	0.09	5.83351e-54	Neurons	MDK
HMGN3	1.87361e-58	1.62207	0.85	0.183	6.31294e-54	Neurons	HMGN3
KIF5B	7.17683e-58	1.06401	0.662	0.112	2.41816e-53	Neurons	KIF5B
LGALS3.1	1.88116e-57	1.26052	0.7	0.118	6.33839e-53	Neurons	LGALS3
CLIC1.1	2.23518e-57	1.02723	0.838	0.174	7.53122e-53	Neurons	CLIC1
LGALS1.1	5.76909e-57	2.15828	0.825	0.168	1.94384e-52	Neurons	LGALS1
EIF5A	6.65665e-57	1.41862	0.662	0.111	2.24289e-52	Neurons	EIF5A
EMP3.1	6.94254e-57	1.09554	0.613	0.095	2.33922e-52	Neurons	EMP3
TUBB	3.71778e-56	2.47801	0.925	0.242	1.25267e-51	Neurons	TUBB
SRSF3	3.94578e-56	1.19989	0.838	0.182	1.32949e-51	Neurons	SRSF3
UQCR10	4.50792e-56	1.05716	0.825	0.173	1.5189e-51	Neurons	UQCR10
ACTB.2	5.73484e-56	2.21096	0.95	0.256	1.9323e-51	Neurons	ACTB
HMGA1	3.03852e-53	1.38682	0.863	0.191	1.0238e-48	Neurons	HMGA1
FKBP1A	2.11435e-52	1.24723	0.75	0.149	7.1241e-48	Neurons	FKBP1A
RAN	2.33368e-52	1.06421	0.912	0.226	7.86311e-48	Neurons	RAN
HMGB1	1.14202e-51	1.48835	0.9	0.226	3.84792e-47	Neurons	HMGB1
MT2A.1	2.59774e-51	2.38283	0.588	0.099	8.75283e-47	Neurons	MT2A
ENO1	1.3509e-49	1.01521	0.787	0.166	4.55171e-45	Neurons	ENO1
ARL6IP1	2.87599e-49	1.86083	0.613	0.112	9.69035e-45	Neurons	ARL6IP1
PFN1.1	1.33249e-47	1.15676	0.875	0.216	4.48968e-43	Neurons	PFN1
CALM2	3.33137e-47	1.61347	0.85	0.22	1.12247e-42	Neurons	CALM2
CFL1.1	1.28307e-45	1.00372	0.963	0.262	4.32316e-41	Neurons	CFL1
DYNLL1	5.47565e-43	1.02574	0.85	0.219	1.84496e-38	Neurons	DYNLL1
TXN	1.76136e-42	1.04167	0.938	0.271	5.93473e-38	Neurons	TXN
HIST1H4C.1	3.44962e-41	1.49901	0.525	0.094	1.16232e-36	Neurons	HIST1H4C
HLA-A.1	3.96324e-41	1.53299	0.863	0.23	1.33537e-36	Neurons	HLA-A
ANXA5	3.22285e-40	1.17636	0.938	0.269	1.08591e-35	Neurons	ANXA5
COX7A2	1.05102e-39	1.01862	0.938	0.28	3.5413e-35	Neurons	COX7A2
SDCBP	7.99871e-37	1.19261	0.9	0.261	2.69509e-32	Neurons	SDCBP
LDHA	1.31168e-35	1.26098	0.912	0.273	4.41958e-31	Neurons	LDHA
APOC1.1	1.03451e-25	1.26226	0.575	0.152	3.48566e-21	Neurons	APOC1
HSP90AB1	2.39497e-22	1.05889	0.938	0.372	8.06961e-18	Neurons	HSP90AB1
B2M.2	5.24969e-20	1.12023	0.825	0.317	1.76883e-15	Neurons	B2M
MALAT1.1	2.20854e-13	-1.32456	0.838	0.909	7.44145e-09	Neurons	MALAT1
MGP	0	5.1614	0.703	0.003	0	Endothelial_cells	MGP
SPARCL1	0	4.24597	0.757	0.001	0	Endothelial_cells	SPARCL1
ID3	0	3.93683	0.73	0.006	0	Endothelial_cells	ID3
NDUFA4L2	0	3.60307	0.405	0.003	0	Endothelial_cells	NDUFA4L2
PDGFRB	0	3.2882	0.541	0.001	0	Endothelial_cells	PDGFRB
COL3A1	0	3.03254	0.405	0.001	0	Endothelial_cells	COL3A1
TCF4	0	2.98039	0.784	0.01	0	Endothelial_cells	TCF4
PLVAP	0	2.76608	0.351	0.001	0	Endothelial_cells	PLVAP
THY1	0	2.69458	0.541	0.001	0	Endothelial_cells	THY1
VWF	0	2.67674	0.297	0.001	0	Endothelial_cells	VWF
FRZB	0	2.66599	0.432	0.002	0	Endothelial_cells	FRZB
ESAM	0	2.35872	0.595	0	0	Endothelial_cells	ESAM
ARHGAP29	0	2.31225	0.676	0.005	0	Endothelial_cells	ARHGAP29
COL4A1	0	2.31013	0.405	0.002	0	Endothelial_cells	COL4A1
RAMP3	0	2.30858	0.324	0	0	Endothelial_cells	RAMP3
TM4SF1	0	2.29626	0.486	0.001	0	Endothelial_cells	TM4SF1
NOTCH3	0	2.2284	0.486	0.001	0	Endothelial_cells	NOTCH3
IGFBP5	0	2.16758	0.27	0.001	0	Endothelial_cells	IGFBP5
COL4A2	0	1.96611	0.514	0.003	0	Endothelial_cells	COL4A2
CLEC14A	0	1.90747	0.297	0	0	Endothelial_cells	CLEC14A
TINAGL1	0	1.78817	0.432	0.001	0	Endothelial_cells	TINAGL1
COL6A3	0	1.78792	0.297	0	0	Endothelial_cells	COL6A3
CD34	0	1.74364	0.297	0	0	Endothelial_cells	CD34
STEAP4	0	1.61963	0.27	0.001	0	Endothelial_cells	STEAP4
ITGA1	0	1.60461	0.432	0.002	0	Endothelial_cells	ITGA1
EFNB2	0	1.5289	0.351	0.001	0	Endothelial_cells	EFNB2
GGT5	0	1.5235	0.378	0	0	Endothelial_cells	GGT5
LRRC32	0	1.52153	0.405	0	0	Endothelial_cells	LRRC32
PECAM1	0	1.51932	0.297	0.001	0	Endothelial_cells	PECAM1
GJA4	0	1.47028	0.351	0	0	Endothelial_cells	GJA4
ZEB1	0	1.45394	0.351	0.002	0	Endothelial_cells	ZEB1
COX4I2	0	1.44269	0.297	0	0	Endothelial_cells	COX4I2
CCDC102B	0	1.4246	0.459	0.004	0	Endothelial_cells	CCDC102B
KDR	0	1.38071	0.27	0.001	0	Endothelial_cells	KDR
PLXDC1	0	1.33201	0.297	0.001	0	Endothelial_cells	PLXDC1
EBF1	0	1.32092	0.486	0.002	0	Endothelial_cells	EBF1
ECSCR.1	0	1.25209	0.27	0	0	Endothelial_cells	ECSCR.1
PMEPA1	0	1.24073	0.405	0.003	0	Endothelial_cells	PMEPA1
ADGRF5	0	1.21292	0.378	0	0	Endothelial_cells	ADGRF5
CYP1B1	0	1.17263	0.27	0.001	0	Endothelial_cells	CYP1B1
EDNRA	0	1.17143	0.351	0.001	0	Endothelial_cells	EDNRA
NRP1	0	1.16467	0.432	0.001	0	Endothelial_cells	NRP1
RCAN2	0	1.15786	0.297	0.001	0	Endothelial_cells	RCAN2
SDPR	0	1.14929	0.324	0	0	Endothelial_cells	SDPR
FAM162B	0	1.09802	0.27	0	0	Endothelial_cells	FAM162B
IGFBP4	4.31958e-300	2.88166	0.676	0.011	1.45544e-295	Endothelial_cells	IGFBP4
F2R	9.99926e-296	1.15822	0.351	0.003	3.36915e-291	Endothelial_cells	F2R
FN1	3.48808e-287	2.00828	0.351	0.003	1.17528e-282	Endothelial_cells	FN1
PLAC9	9.86195e-269	1.48981	0.324	0.003	3.32289e-264	Endothelial_cells	PLAC9
ANGPT2	1.17203e-249	2.08565	0.351	0.003	3.94905e-245	Endothelial_cells	ANGPT2
RGS5	6.62506e-248	4.14903	0.405	0.005	2.23225e-243	Endothelial_cells	RGS5
TNFSF10	7.9692e-237	1.26372	0.27	0.002	2.68514e-232	Endothelial_cells	TNFSF10
OLFML2A	3.65126e-224	1.04406	0.324	0.003	1.23025e-219	Endothelial_cells	OLFML2A
CPE	5.31192e-217	1.94261	0.432	0.006	1.7898e-212	Endothelial_cells	CPE
PODXL	3.53065e-202	1.88474	0.297	0.003	1.18962e-197	Endothelial_cells	PODXL
TAGLN	5.34808e-202	4.00839	0.432	0.007	1.80198e-197	Endothelial_cells	TAGLN
GMFG.1	1.30401e-198	1.51582	0.486	0.008	4.39375e-194	Endothelial_cells	GMFG
EHD2	1.74204e-196	1.20767	0.297	0.003	5.86962e-192	Endothelial_cells	EHD2
LHFP	7.08342e-196	1.75844	0.486	0.009	2.38669e-191	Endothelial_cells	LHFP
FXYD6	1.52464e-187	1.72411	0.486	0.009	5.13712e-183	Endothelial_cells	FXYD6
PLPP3	5.48886e-184	1.33668	0.324	0.004	1.84942e-179	Endothelial_cells	PLPP3
PGF	1.01391e-183	1.62673	0.378	0.006	3.41627e-179	Endothelial_cells	PGF
IGFBP6	5.17151e-174	2.24232	0.351	0.005	1.74249e-169	Endothelial_cells	IGFBP6
CRIP1.1	3.82703e-171	1.03494	0.297	0.004	1.28948e-166	Endothelial_cells	CRIP1
ARHGDIB.1	2.15765e-162	2.38669	0.703	0.023	7.26999e-158	Endothelial_cells	ARHGDIB
MAP1B	8.15856e-162	1.42716	0.378	0.006	2.74895e-157	Endothelial_cells	MAP1B
COL1A2	1.35867e-160	2.62539	0.432	0.009	4.5779e-156	Endothelial_cells	COL1A2
EPAS1	2.15637e-160	2.68843	0.676	0.022	7.26566e-156	Endothelial_cells	EPAS1
SOCS2	3.57781e-153	1.01225	0.351	0.006	1.20551e-148	Endothelial_cells	SOCS2
IFI27	4.28387e-153	2.96959	0.649	0.02	1.44341e-148	Endothelial_cells	IFI27
BGN	2.37833e-148	3.41143	0.703	0.026	8.01356e-144	Endothelial_cells	BGN
PCOLCE	3.21352e-147	1.6415	0.351	0.006	1.08276e-142	Endothelial_cells	PCOLCE
RBP1	2.73558e-142	1.05248	0.297	0.004	9.21728e-138	Endothelial_cells	RBP1
GIMAP4.1	3.67395e-128	1.23116	0.27	0.004	1.2379e-123	Endothelial_cells	GIMAP4
PLXND1	1.92666e-121	1.24127	0.486	0.015	6.49169e-117	Endothelial_cells	PLXND1
SPARC	8.67892e-119	4.12931	0.865	0.051	2.92427e-114	Endothelial_cells	SPARC
RNASE1	1.18433e-115	1.27964	0.297	0.005	3.99049e-111	Endothelial_cells	RNASE1
ENG	9.14342e-113	2.28896	0.486	0.016	3.08078e-108	Endothelial_cells	ENG
ADIRF	2.18504e-110	3.32601	0.703	0.034	7.36228e-106	Endothelial_cells	ADIRF
C1orf54	1.81016e-108	1.06857	0.432	0.013	6.09914e-104	Endothelial_cells	C1orf54
MXRA8	2.81193e-107	1.3386	0.405	0.011	9.4745e-103	Endothelial_cells	MXRA8
SLC9A3R2	1.75047e-98	2.49516	0.405	0.013	5.89804e-94	Endothelial_cells	SLC9A3R2
XAF1	1.92813e-97	1.10474	0.297	0.007	6.49663e-93	Endothelial_cells	XAF1
BST2.1	9.02393e-97	1.84789	0.514	0.02	3.04052e-92	Endothelial_cells	BST2
CD9	2.73176e-96	2.04647	0.486	0.019	9.20439e-92	Endothelial_cells	CD9
TGFBR2	1.21773e-93	1.51324	0.351	0.01	4.10302e-89	Endothelial_cells	TGFBR2
JAG1	4.80262e-92	1.08956	0.27	0.006	1.61819e-87	Endothelial_cells	JAG1
AXL	1.65422e-90	1.27677	0.27	0.006	5.57374e-86	Endothelial_cells	AXL
CFH	3.35165e-90	1.48563	0.27	0.006	1.1293e-85	Endothelial_cells	CFH
MYLK	3.87422e-89	1.16288	0.324	0.009	1.30538e-84	Endothelial_cells	MYLK
IGFBP2	1.14958e-87	3.07465	0.541	0.026	3.87339e-83	Endothelial_cells	IGFBP2
TPM2	5.93202e-87	2.26619	0.486	0.021	1.99874e-82	Endothelial_cells	TPM2
FSTL1	1.55722e-81	1.66872	0.514	0.025	5.2469e-77	Endothelial_cells	FSTL1
SELM	9.72151e-80	1.43514	0.514	0.025	3.27556e-75	Endothelial_cells	SELM
PTRF	2.97461e-79	2.0456	0.73	0.052	1.00227e-74	Endothelial_cells	PTRF
CTGF	1.50191e-78	1.83594	0.405	0.016	5.06054e-74	Endothelial_cells	CTGF
ID1	5.08544e-77	2.80749	0.351	0.012	1.71349e-72	Endothelial_cells	ID1
CRIP2	1.63869e-76	1.96423	0.568	0.032	5.52141e-72	Endothelial_cells	CRIP2
SRGN.1	2.33485e-74	1.68879	0.649	0.043	7.86705e-70	Endothelial_cells	SRGN
NOTCH4	1.21749e-72	1.51464	0.297	0.009	4.10222e-68	Endothelial_cells	NOTCH4
RGCC.1	2.21626e-72	3.30728	0.405	0.017	7.46746e-68	Endothelial_cells	RGCC
MCAM	2.79218e-72	1.97229	0.486	0.025	9.40796e-68	Endothelial_cells	MCAM
TIMP3	3.23265e-71	2.58983	0.676	0.05	1.08921e-66	Endothelial_cells	TIMP3
GPRC5C	1.19355e-70	1.55525	0.351	0.013	4.02155e-66	Endothelial_cells	GPRC5C
HES1	1.50595e-69	2.53574	0.622	0.043	5.07414e-65	Endothelial_cells	HES1
SDC2	3.03374e-69	1.34771	0.27	0.008	1.02219e-64	Endothelial_cells	SDC2
TSC22D3.1	8.32586e-66	1.40321	0.514	0.03	2.80532e-61	Endothelial_cells	TSC22D3
TMEM204	1.34519e-65	1.51495	0.351	0.014	4.53247e-61	Endothelial_cells	TMEM204
GSN	1.2772e-64	3.02105	0.73	0.065	4.30338e-60	Endothelial_cells	GSN
NR2F2	5.61816e-63	2.03581	0.541	0.036	1.89298e-58	Endothelial_cells	NR2F2
MACF1	4.59031e-60	1.18264	0.459	0.027	1.54666e-55	Endothelial_cells	MACF1
UACA	4.83593e-57	1.39464	0.541	0.039	1.62942e-52	Endothelial_cells	UACA
RSRP1.1	5.95962e-57	1.23903	0.595	0.047	2.00803e-52	Endothelial_cells	RSRP1
FLNA	2.03496e-56	1.66912	0.622	0.052	6.8566e-52	Endothelial_cells	FLNA
LINC00152.1	2.85973e-56	1.15215	0.459	0.028	9.63557e-52	Endothelial_cells	LINC00152
GAS6	8.36469e-56	1.1108	0.378	0.019	2.8184e-51	Endothelial_cells	GAS6
MYH9.1	1.62372e-55	2.13475	0.676	0.064	5.47096e-51	Endothelial_cells	MYH9
DST	9.77295e-55	1.10019	0.486	0.033	3.2929e-50	Endothelial_cells	DST
COX7A1	1.07807e-54	1.35194	0.432	0.026	3.63244e-50	Endothelial_cells	COX7A1
COL6A2	1.38461e-54	1.93084	0.486	0.033	4.66531e-50	Endothelial_cells	COL6A2
TGFB1I1	1.19172e-53	1.29382	0.351	0.017	4.01538e-49	Endothelial_cells	TGFB1I1
SYNPO	1.18961e-52	1.00336	0.27	0.01	4.00827e-48	Endothelial_cells	SYNPO
EMP2	2.78163e-52	1.26365	0.486	0.034	9.37244e-48	Endothelial_cells	EMP2
TSC22D1	3.91339e-52	2.28016	0.595	0.052	1.31858e-47	Endothelial_cells	TSC22D1
ADD1	7.42492e-51	1.03001	0.541	0.044	2.50175e-46	Endothelial_cells	ADD1
TMSB4X.2	1.19008e-50	3.37443	1	0.17	4.00987e-46	Endothelial_cells	TMSB4X
WWTR1	8.74652e-50	1.14546	0.297	0.013	2.94705e-45	Endothelial_cells	WWTR1
TACC1	2.98192e-49	1.32915	0.595	0.054	1.00473e-44	Endothelial_cells	TACC1
PRKCDBP	6.03065e-48	1.6794	0.486	0.037	2.03197e-43	Endothelial_cells	PRKCDBP
TPM4.1	7.27791e-48	1.45663	0.595	0.056	2.45222e-43	Endothelial_cells	TPM4
COL6A1	1.88075e-47	1.69974	0.486	0.038	6.33699e-43	Endothelial_cells	COL6A1
HES4	5.2304e-47	1.30431	0.459	0.034	1.76233e-42	Endothelial_cells	HES4
BCAM	9.03894e-47	1.0487	0.297	0.014	3.04558e-42	Endothelial_cells	BCAM
SEC14L1	9.86243e-46	1.14001	0.378	0.024	3.32305e-41	Endothelial_cells	SEC14L1
CLIC4	1.74703e-45	1.15429	0.514	0.044	5.88645e-41	Endothelial_cells	CLIC4
DPYSL2	3.12509e-45	1.20641	0.378	0.024	1.05297e-40	Endothelial_cells	DPYSL2
APP	8.42653e-45	2.0737	0.784	0.104	2.83924e-40	Endothelial_cells	APP
NFIB	1.54665e-44	1.55173	0.405	0.028	5.21127e-40	Endothelial_cells	NFIB
RNF168	2.43324e-44	1.22848	0.297	0.015	8.19855e-40	Endothelial_cells	RNF168
GNAI2	1.89161e-42	1.46172	0.514	0.047	6.37359e-38	Endothelial_cells	GNAI2
TBX2	1.92998e-42	1.20751	0.405	0.029	6.50287e-38	Endothelial_cells	TBX2
ACTA2	2.26405e-42	2.9492	0.405	0.03	7.62847e-38	Endothelial_cells	ACTA2
DUSP1.1	3.84421e-42	2.51586	0.541	0.053	1.29527e-37	Endothelial_cells	DUSP1
CNN3	4.20495e-42	1.75422	0.568	0.059	1.41682e-37	Endothelial_cells	CNN3
IGFBP7	1.14016e-41	4.34167	0.892	0.164	3.84166e-37	Endothelial_cells	IGFBP7
SLC2A3	1.19238e-41	1.03321	0.27	0.013	4.0176e-37	Endothelial_cells	SLC2A3
LIMA1	1.23471e-41	1.14317	0.432	0.034	4.16025e-37	Endothelial_cells	LIMA1
PLPP1	4.50035e-41	1.24315	0.324	0.019	1.51635e-36	Endothelial_cells	PLPP1
CALD1	1.18348e-40	2.66432	0.784	0.12	3.98761e-36	Endothelial_cells	CALD1
STOM	9.7312e-40	1.39266	0.541	0.056	3.27883e-35	Endothelial_cells	STOM
EPHX1	1.42005e-39	1.31536	0.324	0.02	4.78471e-35	Endothelial_cells	EPHX1
PAM	2.8993e-39	1.09563	0.297	0.017	9.76889e-35	Endothelial_cells	PAM
TPM1	3.59215e-39	2.16052	0.514	0.051	1.21034e-34	Endothelial_cells	TPM1
PDLIM1	4.74706e-39	1.11312	0.541	0.055	1.59947e-34	Endothelial_cells	PDLIM1
ISG15.1	5.37273e-39	1.83926	0.351	0.024	1.81029e-34	Endothelial_cells	ISG15
SERPINH1	8.23369e-39	1.304	0.514	0.052	2.77426e-34	Endothelial_cells	SERPINH1
NFKBIA.1	1.38747e-38	1.58328	0.541	0.056	4.67493e-34	Endothelial_cells	NFKBIA
HLA-B.1	4.03033e-38	2.86418	0.892	0.162	1.35798e-33	Endothelial_cells	HLA-B
PRSS23	5.39254e-37	1.72146	0.297	0.018	1.81696e-32	Endothelial_cells	PRSS23
MEF2C	1.12621e-36	2.06439	0.622	0.08	3.79466e-32	Endothelial_cells	MEF2C
HLA-C.1	3.81986e-36	2.54243	0.838	0.154	1.28706e-31	Endothelial_cells	HLA-C
ARGLU1.1	5.83304e-36	1.52703	0.622	0.081	1.96539e-31	Endothelial_cells	ARGLU1
SASH1	1.50984e-35	1.41286	0.324	0.022	5.08726e-31	Endothelial_cells	SASH1
CALM1.1	3.98888e-35	2.05723	0.892	0.169	1.34401e-30	Endothelial_cells	CALM1
WASF2	4.41253e-35	1.04758	0.595	0.075	1.48676e-30	Endothelial_cells	WASF2
ITGB1	5.60779e-35	1.74394	0.595	0.077	1.88949e-30	Endothelial_cells	ITGB1
HTRA1	8.07174e-35	1.47866	0.27	0.016	2.71969e-30	Endothelial_cells	HTRA1
UTRN	9.38165e-35	1.31009	0.378	0.031	3.16105e-30	Endothelial_cells	UTRN
COL18A1	2.28918e-34	1.5422	0.405	0.036	7.71317e-30	Endothelial_cells	COL18A1
SPTBN1	2.28544e-33	1.39175	0.595	0.08	7.70057e-29	Endothelial_cells	SPTBN1
SEPT7.1	3.30485e-33	1.39499	0.757	0.129	1.11354e-28	Endothelial_cells	2024-09-07
A2M	3.80442e-33	1.84764	0.757	0.123	1.28186e-28	Endothelial_cells	A2M
GANAB	4.26175e-33	1.19445	0.405	0.037	1.43595e-28	Endothelial_cells	GANAB
DLC1	3.10361e-32	1.33491	0.405	0.038	1.04573e-27	Endothelial_cells	DLC1
ABI2	3.57136e-32	1.00527	0.405	0.038	1.20333e-27	Endothelial_cells	ABI2
RERE	3.17757e-31	1.55832	0.324	0.025	1.07065e-26	Endothelial_cells	RERE
RAMP2	1.03699e-30	1.7493	0.297	0.022	3.49404e-26	Endothelial_cells	RAMP2
ACTN4	2.53783e-30	1.51144	0.568	0.079	8.55098e-26	Endothelial_cells	ACTN4
ZFP36L1	3.7579e-30	1.88306	0.649	0.103	1.26619e-25	Endothelial_cells	ZFP36L1
IFITM2.1	6.3497e-30	1.71503	0.73	0.131	2.13947e-25	Endothelial_cells	IFITM2
LBH.1	1.74023e-29	1.16654	0.27	0.019	5.86353e-25	Endothelial_cells	LBH
ITM2B.1	2.01331e-29	1.97412	0.784	0.155	6.78365e-25	Endothelial_cells	ITM2B
NPDC1	4.5091e-29	1.27813	0.324	0.027	1.5193e-24	Endothelial_cells	NPDC1
DDX5.1	8.33279e-29	1.54523	0.838	0.176	2.80765e-24	Endothelial_cells	DDX5
IFI6.1	9.69225e-29	1.16877	0.405	0.041	3.26571e-24	Endothelial_cells	IFI6
NDRG2	1.03545e-28	1.07083	0.324	0.027	3.48884e-24	Endothelial_cells	NDRG2
HCFC1R1	2.04989e-28	1.45741	0.541	0.075	6.90691e-24	Endothelial_cells	HCFC1R1
TRA2B	2.29789e-28	1.32589	0.595	0.091	7.7425e-24	Endothelial_cells	TRA2B
VAMP5	5.07752e-28	1.67679	0.541	0.077	1.71082e-23	Endothelial_cells	VAMP5
N4BP2L2.1	5.54754e-28	1.51548	0.649	0.111	1.86919e-23	Endothelial_cells	N4BP2L2
LEPROT	7.7895e-28	1.0215	0.486	0.063	2.6246e-23	Endothelial_cells	LEPROT
IFITM3	1.04113e-27	2.13448	0.892	0.222	3.50799e-23	Endothelial_cells	IFITM3
CYB5R3	8.23829e-27	1.36427	0.541	0.08	2.77581e-22	Endothelial_cells	CYB5R3
B2M.3	1.14639e-26	2.74195	0.973	0.318	3.86264e-22	Endothelial_cells	B2M
OAZ2	1.39519e-26	1.24398	0.514	0.073	4.70097e-22	Endothelial_cells	OAZ2
PNISR.1	1.51711e-26	1.33164	0.622	0.107	5.11174e-22	Endothelial_cells	PNISR
RHOC	1.61454e-26	1.51395	0.676	0.123	5.44005e-22	Endothelial_cells	RHOC
VAMP2.1	2.04616e-26	1.2735	0.622	0.107	6.89434e-22	Endothelial_cells	VAMP2
IL6ST	2.75637e-26	1.33677	0.432	0.053	9.28731e-22	Endothelial_cells	IL6ST
DDX46	3.16804e-26	1.13267	0.568	0.089	1.06744e-21	Endothelial_cells	DDX46
ATPIF1.1	4.10019e-26	1.44172	0.622	0.106	1.38152e-21	Endothelial_cells	ATPIF1
LGALS1.2	1.13472e-25	2.20845	0.784	0.17	3.82334e-21	Endothelial_cells	LGALS1
ZFP36L2.1	1.15279e-25	1.26614	0.514	0.075	3.8842e-21	Endothelial_cells	ZFP36L2
SON.1	1.269e-25	1.24276	0.703	0.133	4.27578e-21	Endothelial_cells	SON
MYL6.2	1.46723e-25	1.92334	0.919	0.248	4.94369e-21	Endothelial_cells	MYL6
CD99.1	3.03876e-25	1.20306	0.649	0.121	1.02388e-20	Endothelial_cells	CD99
DYNLL1.1	3.17948e-25	1.00127	0.919	0.221	1.07129e-20	Endothelial_cells	DYNLL1
VKORC1	4.07214e-25	1.26039	0.622	0.107	1.37207e-20	Endothelial_cells	VKORC1
JUN.1	4.11579e-25	2.58051	0.622	0.109	1.38677e-20	Endothelial_cells	JUN
MXRA7	5.65866e-25	1.01453	0.324	0.031	1.90663e-20	Endothelial_cells	MXRA7
PTMS.1	7.39949e-25	1.34824	0.568	0.093	2.49318e-20	Endothelial_cells	PTMS
KLF2	8.79548e-25	1.12825	0.351	0.037	2.96355e-20	Endothelial_cells	KLF2
MYL9	1.0265e-24	2.72094	0.595	0.106	3.4587e-20	Endothelial_cells	MYL9
HLA-A.2	1.23897e-24	1.86054	0.919	0.232	4.1746e-20	Endothelial_cells	HLA-A
PSAP	1.60478e-24	1.04251	0.73	0.147	5.40714e-20	Endothelial_cells	PSAP
CTNND1	2.55901e-24	1.26988	0.378	0.044	8.62231e-20	Endothelial_cells	CTNND1
EGFL7	3.04579e-24	1.84344	0.405	0.051	1.02625e-19	Endothelial_cells	EGFL7
TUBA1A	3.38501e-24	1.13364	0.486	0.07	1.14054e-19	Endothelial_cells	TUBA1A
RNF213.1	3.98458e-24	1.11795	0.432	0.057	1.34256e-19	Endothelial_cells	RNF213
ZFP36.1	7.23315e-24	1.89502	0.486	0.071	2.43714e-19	Endothelial_cells	ZFP36
TNFRSF1A	1.33007e-23	1.02699	0.351	0.039	4.48155e-19	Endothelial_cells	TNFRSF1A
LPP	3.89704e-23	1.02393	0.351	0.04	1.31307e-18	Endothelial_cells	LPP
TAGLN2.1	6.57713e-23	1.19418	0.595	0.108	2.2161e-18	Endothelial_cells	TAGLN2
CD74.2	8.14104e-23	1.57075	0.297	0.028	2.74304e-18	Endothelial_cells	CD74
EPS8	1.93432e-22	1.17314	0.459	0.069	6.5175e-18	Endothelial_cells	EPS8
TMEM59	3.75727e-22	1.26993	0.622	0.123	1.26598e-17	Endothelial_cells	TMEM59
HLA-E.1	6.87328e-22	2.14006	0.649	0.139	2.31588e-17	Endothelial_cells	HLA-E
RDX	7.55153e-22	1.23797	0.514	0.085	2.54441e-17	Endothelial_cells	RDX
RHOB	9.2876e-22	1.54025	0.432	0.063	3.12937e-17	Endothelial_cells	RHOB
MT2A.2	1.75787e-21	2.61632	0.541	0.101	5.92296e-17	Endothelial_cells	MT2A
DDIT4.1	6.17532e-21	1.19893	0.297	0.031	2.08071e-16	Endothelial_cells	DDIT4
PTPRM	1.23713e-20	1.08711	0.297	0.032	4.16838e-16	Endothelial_cells	PTPRM
ACTB.3	1.24153e-20	1.72038	0.892	0.257	4.18322e-16	Endothelial_cells	ACTB
GNB1	3.14772e-20	1.11237	0.378	0.052	1.06059e-15	Endothelial_cells	GNB1
ARHGEF12	4.06629e-20	1.38911	0.324	0.039	1.37009e-15	Endothelial_cells	ARHGEF12
TIMP1	4.06929e-20	2.28581	0.622	0.132	1.37111e-15	Endothelial_cells	TIMP1
CGGBP1	7.49597e-20	1.27626	0.351	0.046	2.52569e-15	Endothelial_cells	CGGBP1
BNIP3L	9.00107e-20	1.28098	0.459	0.077	3.03282e-15	Endothelial_cells	BNIP3L
NEAT1	9.22814e-20	1.48954	0.784	0.192	3.10933e-15	Endothelial_cells	NEAT1
CCNL1.1	9.6125e-20	1.5864	0.486	0.085	3.23884e-15	Endothelial_cells	CCNL1
VASP	1.10485e-19	1.13285	0.324	0.039	3.72268e-15	Endothelial_cells	VASP
CALR.1	2.33353e-19	1.09172	0.595	0.124	7.8626e-15	Endothelial_cells	CALR
CDC40	2.50958e-19	1.17981	0.297	0.034	8.45577e-15	Endothelial_cells	CDC40
RPS12.1	4.17522e-19	-2.02042	0.919	0.958	1.4068e-14	Endothelial_cells	RPS12
CNBP	5.67413e-19	1.00064	0.703	0.163	1.91184e-14	Endothelial_cells	CNBP
CST3.1	7.01254e-19	1.1811	0.757	0.186	2.36281e-14	Endothelial_cells	CST3
FKBP1A.1	1.51927e-18	1.28835	0.649	0.15	5.11903e-14	Endothelial_cells	FKBP1A
JUNB.1	1.80793e-18	1.3949	0.595	0.12	6.09165e-14	Endothelial_cells	JUNB
TMEM173	2.14036e-18	1.04406	0.351	0.049	7.21172e-14	Endothelial_cells	TMEM173
MSN.1	6.08262e-18	1.03472	0.378	0.057	2.04948e-13	Endothelial_cells	MSN
BBX	6.45665e-18	1.16516	0.432	0.074	2.1755e-13	Endothelial_cells	BBX
FOS.1	1.0997e-17	1.35729	0.622	0.135	3.70533e-13	Endothelial_cells	FOS
H3F3B.1	2.38733e-17	1.33315	0.838	0.261	8.04387e-13	Endothelial_cells	H3F3B
TGOLN2	5.93365e-17	1.18443	0.351	0.052	1.99928e-12	Endothelial_cells	TGOLN2
2024-09-04	5.98367e-17	1.08571	0.324	0.045	2.01614e-12	Endothelial_cells	2024-09-04
RPS18.1	8.83531e-17	-1.68793	1	0.973	2.97697e-12	Endothelial_cells	RPS18
MED4	9.5137e-17	1.12075	0.378	0.06	3.20555e-12	Endothelial_cells	MED4
CARHSP1	1.29436e-16	1.05673	0.378	0.062	4.36123e-12	Endothelial_cells	CARHSP1
BTG1.2	1.7697e-16	1.00868	0.757	0.198	5.96281e-12	Endothelial_cells	BTG1
WSB1	5.17985e-16	1.14423	0.486	0.102	1.7453e-11	Endothelial_cells	WSB1
TXNIP.1	6.77991e-16	1.3095	0.459	0.091	2.28442e-11	Endothelial_cells	TXNIP
SMARCE1	1.02006e-15	1.0159	0.378	0.064	3.43699e-11	Endothelial_cells	SMARCE1
HSP90B1	1.16751e-15	1.14232	0.514	0.113	3.93382e-11	Endothelial_cells	HSP90B1
RPLP1	1.50144e-15	-1.41592	1	0.97	5.05897e-11	Endothelial_cells	RPLP1
MALAT1.2	1.68153e-15	1.94865	1	0.909	5.66575e-11	Endothelial_cells	MALAT1
RPL12.1	4.38819e-15	-2.04228	0.973	0.902	1.47856e-10	Endothelial_cells	RPL12
MFGE8	9.66258e-15	1.29064	0.459	0.1	3.25571e-10	Endothelial_cells	MFGE8
SCP2	7.39462e-14	1.00605	0.405	0.081	2.49154e-09	Endothelial_cells	SCP2
YWHAH	2.10797e-13	1.15137	0.405	0.083	7.10261e-09	Endothelial_cells	YWHAH
HERPUD1	3.65671e-13	1.63078	0.378	0.076	1.23209e-08	Endothelial_cells	HERPUD1
MARCKSL1	1.347e-12	1.16753	0.459	0.11	4.53859e-08	Endothelial_cells	MARCKSL1
IVNS1ABP	8.0245e-12	1.38488	0.297	0.053	2.70378e-07	Endothelial_cells	IVNS1ABP
TMSB10.2	1.09023e-11	1.60846	0.973	0.447	3.67341e-07	Endothelial_cells	TMSB10
RPL13A	1.41368e-11	-1.21713	1	0.925	4.76326e-07	Endothelial_cells	RPL13A
IER2	6.16781e-11	1.01316	0.432	0.106	2.07818e-06	Endothelial_cells	IER2
RPL37A.1	7.03559e-10	-1.43863	0.973	0.851	2.37057e-05	Endothelial_cells	RPL37A
RPL8.1	1.26983e-09	-1.54287	0.973	0.812	4.27858e-05	Endothelial_cells	RPL8
RPL31.1	1.43594e-09	-1.46523	1	0.848	4.83827e-05	Endothelial_cells	RPL31
RPS3	2.01233e-09	-1.51031	0.973	0.84	6.78036e-05	Endothelial_cells	RPS3
RPS19	2.40781e-09	-1.30678	0.919	0.868	8.11287e-05	Endothelial_cells	RPS19
RPL26	2.90952e-09	-1.44713	0.946	0.849	9.80333e-05	Endothelial_cells	RPL26
RPS3A.1	2.92651e-09	-1.40335	0.946	0.837	9.86058e-05	Endothelial_cells	RPS3A
RPS27A	4.34912e-09	-1.25245	0.973	0.846	0.000146539	Endothelial_cells	RPS27A
RPS23	5.72988e-09	-1.338	0.946	0.85	0.000193063	Endothelial_cells	RPS23
RPL34	7.08335e-09	-1.33272	0.973	0.84	0.000238666	Endothelial_cells	RPL34
RPS2	8.47009e-09	-1.4063	0.973	0.817	0.000285391	Endothelial_cells	RPS2
RPLP2	1.13535e-08	-1.11522	0.946	0.85	0.000382544	Endothelial_cells	RPLP2
RPL7.1	1.25254e-08	-1.38903	0.973	0.822	0.000422031	Endothelial_cells	RPL7
RPS24	3.04496e-08	-1.43863	0.946	0.805	0.00102597	Endothelial_cells	RPS24
RPL18A	3.27906e-08	-1.35001	0.946	0.808	0.00110485	Endothelial_cells	RPL18A
RPS6.1	3.47491e-08	-1.45158	0.973	0.833	0.00117083	Endothelial_cells	RPS6
EEF1A1	3.87647e-08	-1.52894	0.865	0.881	0.00130614	Endothelial_cells	EEF1A1
RPS17	7.95603e-08	-1.21713	1	0.826	0.00268071	Endothelial_cells	RPS17
RPS4X.1	8.68826e-08	-1.24724	0.946	0.814	0.00292742	Endothelial_cells	RPS4X
RPL13	1.22994e-07	-1.18758	0.973	0.841	0.00414415	Endothelial_cells	RPL13
RPL23A	1.23158e-07	-1.29071	0.946	0.789	0.00414969	Endothelial_cells	RPL23A
SAT1.1	1.33605e-07	2.11834	0.568	0.199	0.0045017	Endothelial_cells	SAT1
RPS15	1.6182e-07	-1.33606	0.973	0.777	0.00545237	Endothelial_cells	RPS15
RPL7A.1	2.12918e-07	-1.37673	0.946	0.788	0.00717407	Endothelial_cells	RPL7A
